# Supplementary material for: A Case of Persistent Ventricular Fibrillation Caused by Hydrofluoric Acid Poisoning and Treated with VA-ECMO
Source: Research Square preprint supplement (doi:10.21203/rs.3.rs-8665583/v1), 2026-02-16
Supplement: Supplementary file 1 [file 5bfc773f84925401fb9c507a.docx]

**Table 1.** Laboratory Data

| **Variable** | **Reference Range** | **Day 1，**  **Before all the treatment** | **Day 1，after VF,**  **Before VA-ECMO** | **Day 1，**  **After**  **VA-ECMO** | **Day 2,After**  **Blood Transfusion** | **Day 3** | **Day 5** |
| --- | --- | --- | --- | --- | --- | --- | --- |
| Hemoglobin (g/dl) | 11.5-15.0 | 14.50 | 16.0 | 12.8 | 8.9 | 8.2 | 9.3 |
| White-cell count (per μl) | 3.5-9.50 | 11.72 | 20.53 | 14.48 | 12.65 | 12.11 | 14.65 |
| Platelet count (per μl) | 125-350 | 374 | 357 | 290 | 117 | 79 | 108 |
| Lactate dehydrogenase (U/liter) | 120-250 | 318 | 1000 | 1679 | 1380 | 1310 | 780 |
| Creatine Kinase(U/liter) | 26-174 | 360 | 1894 | 4248 | 3200 | NA | 155 |
| Creatine Kinase lsoenzyme(U/liter) | <25 | 45 | 131 | 99 | 60 | NA | 10 |
| Alanine aminotransferase (U/liter) | 7-45 | 41 | 44 | 61 | 63 | 70 | 110 |
| Aspartate aminotransferase (U/liter) | 13-40 | 61 | 187 | 312 | 344 | 311 | 319 |
| Total bilirubin (μmol/L) | 0-23 | 19.8 | 12.2 | 21.1 | 13.1 | 11.7 | 10.6 |
| Creatinine (μmol/L) | 41-73 | 108 | 118 | 170 | 196 | 176 | 265 |
| Partial thromboplastin time (sec) | 9.80-12.1 | 12 | 14.6 | 14.1 | 14.1 | 15.2 | 11.5 |
| Fibrinogen (g/L) | 1.8-3.5 | 2.51 | 3.47 | 2.61 | 4.56 | 1.38 | 6.06 |
| D‑dimer (mg/L) | 0-0.55 | 14.91 | 13.34 | 7.95 | 3.32 | 1.71 | 3.37 |
| Cholesterol(mmol/L) | 2.3-5.18 | 3.45 | NA | 7.80 | 3.44 | 2.87 | 5.27 |
| Triglyceride(mmol/L) | 0.0-1.7 | 3.65 | NA | 11.1 | 3.80 | 2.51 | 3.27 |
| Potassium ion(mmol/L) | 3.5-5.3 | 5.1 | 3.9 | 3.77 | 3.97 | 3.73 | 4.55 |
| Total Calcium (mmol/L) | 2.11-2.52 | 0.94 | 0.94 | 2.32 | 2.27 | 2.24 | 2.67 |
| Magnesium ion(mmol/L) | 0.7-1.0 | 0.6 | 0.4 | 3.05 | 1.05 | 1.15 | 0.95 |
